# Supplementary material for: Non-invasive SARS-CoV-2 genome surveillance and its utility in resource-poor settings during the Delta wave of the COVID-19 pandemic
Source: bioRxiv or medRxiv preprint supplement (doi:10.1101/2023.02.16.23286031), 2023-03-27

**DISTRIBUTION OF SARS-CoV-2 OTHER VARIANTS IN GARGLE BASED GENOMIC SURVEILLANCE FROM MARCH - DECEMBER 2021**

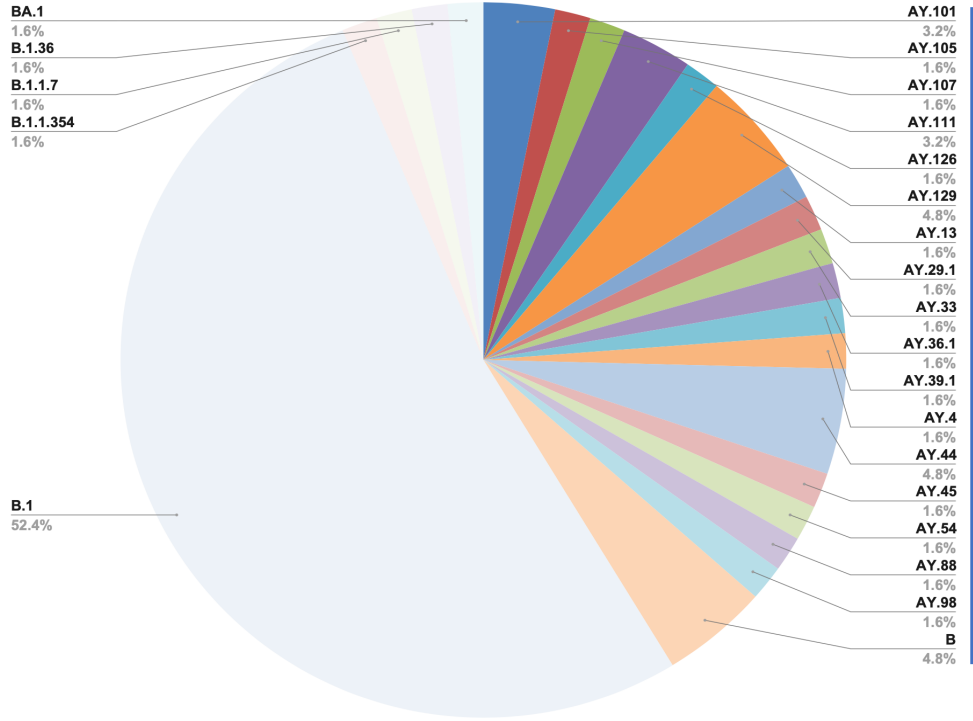

# SARS-CoV-2 major variant pattern

**DISTRIBUTION OF SARS-CoV-2 MAJOR VARIANTS IN GARGLE BASED GENOMIC SURVEILLANCE FROM MARCH - DECEMBER 2021**

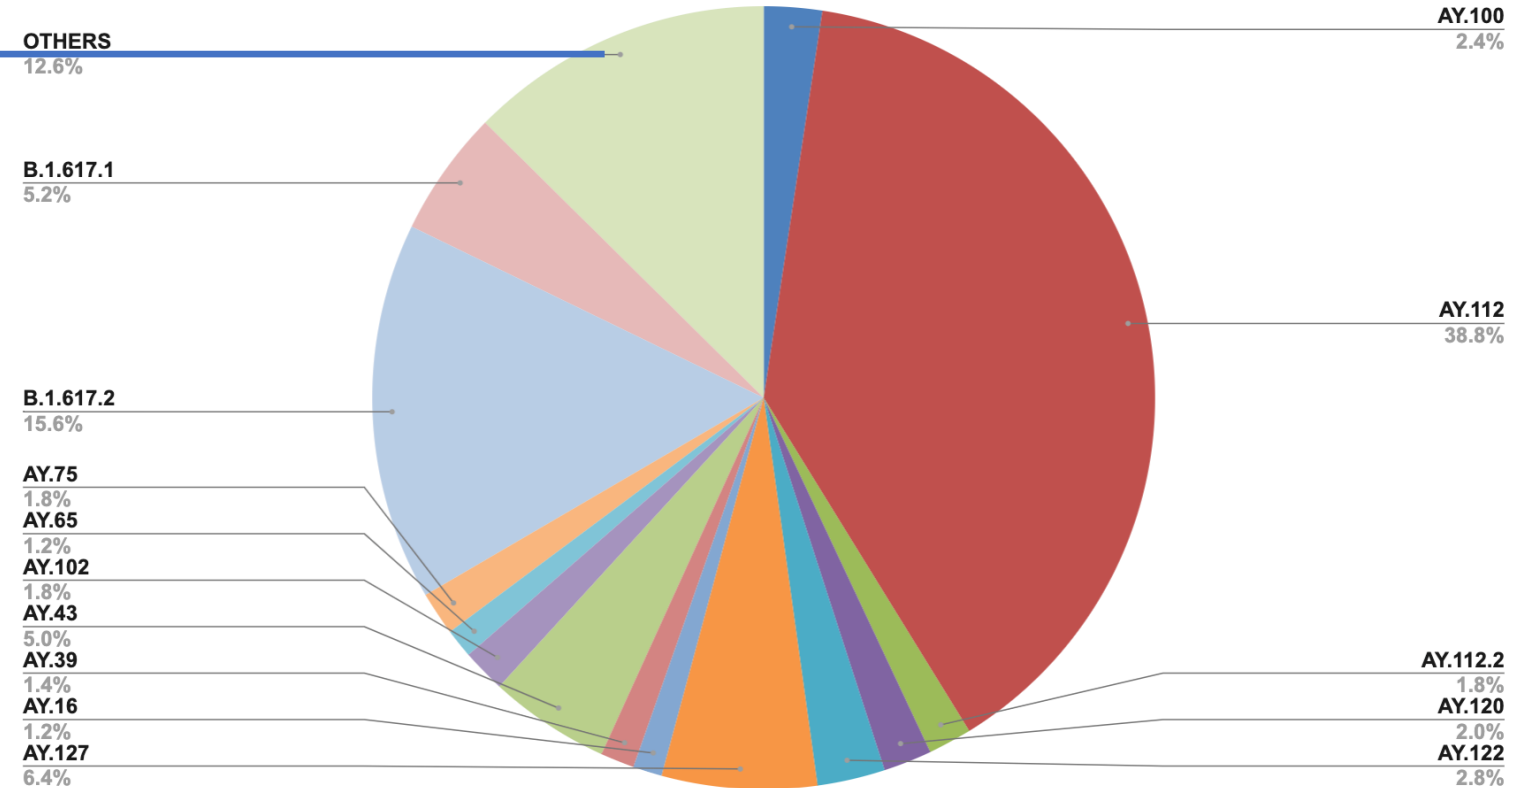

Supplement: Supplementary file [file media-1.pdf]
